# Supplementary material for: How nanoscale surface heterogeneity impacts transport of nano- to micro-particles on surfaces under unfavorable attachment conditions
Source: Royal Society of Chemistry journal article supplement (doi:10.1039/c9en00306a), 2019-01-01
Supplement: c9en00306a1.pdf [file c9en00306a1.pdf]

## Supporting Information for:

### **How Nanoscale Surface Heterogeneity Impacts Transport of Nano- to Micro- Particles on Surfaces under Unfavorable Attachment Conditions**

Cesar A. Ron<sup>1</sup>, Kurt VanNess<sup>1</sup>, Anna Rasmuson<sup>1</sup>, William P. Johnson<sup>1\*</sup>.

<sup>1</sup>Department of Geology & Geophysics, University of Utah, Salt Lake City, UT 84112, USA

**Table SI-1.**  $\zeta$ -potential values used in simulations for CML=carboxylate modified polystyrene latex, CMS= carboxylate modified silica, UMS=unmodified silica. Values were determined from EPM measurements via the Smoluchowski equation<sup>1</sup>. Note that measurements for colloids > 3  $\mu\text{m}$  have inherent uncertainty using this method.

| Material | Colloid Diameter ( $\mu\text{m}$ ) | NaCl (mM) | pH  | $\zeta$ -potential (mV) |
|----------|------------------------------------|-----------|-----|-------------------------|
| CML      | 0.1                                | 6.0       | 6.7 | -45.3                   |
| CML      | 0.3                                | 6.0       | 6.7 | -18.3                   |
| CML      | 1.1                                | 6.0       | 6.7 | -65.4                   |
| CML      | 2.0                                | 6.0       | 6.7 | -29.9                   |
| CML      | 4.4                                | 6.0       | 6.7 | -65.0                   |
| CML      | 6.8                                | 6.0       | 6.7 | -10.2                   |
| CML      | 0.1                                | 20.0      | 6.7 | -35.9                   |
| CML      | 0.3                                | 20.0      | 6.7 | -10.5                   |
| CML      | 1.1                                | 20.0      | 6.7 | -50.1                   |
| CML      | 2.0                                | 20.0      | 6.7 | -8.2                    |
| CML      | 4.4                                | 20.0      | 6.7 | -42.8                   |
| CML      | 6.8                                | 20.0      | 6.7 | -4.5                    |
| CML      | 0.1                                | 6.0       | 8.0 | -61.4                   |
| CML      | 0.3                                | 6.0       | 8.0 | -74.9                   |
| CML      | 1.1                                | 6.0       | 8.0 | -91.0                   |
| CML      | 2.0                                | 6.0       | 8.0 | -80.5                   |
| CML      | 4.4                                | 6.0       | 8.0 | -52.0                   |
| CML      | 6.8                                | 6.0       | 8.0 | -6.9                    |
| CML      | 0.1                                | 20.0      | 8.0 | -42.0                   |
| CML      | 0.3                                | 20.0      | 8.0 | -26.5                   |
| CML      | 1.1                                | 20.0      | 8.0 | -62.2                   |
| CML      | 2.0                                | 20.0      | 8.0 | -63.9                   |
| CML      | 4.4                                | 20.0      | 8.0 | -63.1                   |
| CML      | 6.8                                | 20.0      | 8.0 | -11.8                   |
| CML      | 0.1                                | 50.0      | 2.0 | -13.8                   |
| CML      | 0.3                                | 50.0      | 2.0 | -2.3                    |
| CML      | 1.1                                | 50.0      | 2.0 | -5.1                    |
| CML      | 2.0                                | 50.0      | 2.0 | -5.4                    |
| CML      | 4.4                                | 50.0      | 2.0 | -11.7                   |
| CML      | 6.8                                | 50.0      | 2.0 | 1.9                     |
| CMS      | 1.0                                | 6.0       | 6.7 | -66.7                   |
| CMS      | 3.0                                | 6.0       | 6.7 | -15.4                   |
| UMS      | 3.0                                | 6.0       | 6.7 | -27.6                   |
| CMS      | 1.0                                | 50.0      | 2.0 | 5.1                     |
| CMS      | 3.0                                | 50.0      | 2.0 | 37.4                    |
| UMS      | 3.0                                | 50.0      | 2.0 | -1.7                    |

**Table SI-2.**  $\zeta$ -potential values used in simulations for soda-lime glass collector surface (silica).  $\zeta$ -potential were from representative values reported in the literature.

| <b>Material</b>    | <b>NaCl (mM)</b> | <b>pH</b> | <b><math>\zeta</math>-potential (mV)</b> |
|--------------------|------------------|-----------|------------------------------------------|
| Glass <sup>2</sup> | 6.0              | 6.7       | -70.0                                    |
| Glass <sup>2</sup> | 20.0             | 6.7       | -53.5                                    |
| Glass <sup>2</sup> | 6.0              | 8.0       | -80.0                                    |
| Glass <sup>2</sup> | 20.0             | 8.0       | -70.0                                    |
| Glass <sup>3</sup> | 50.0             | 2.0       | -10.0                                    |

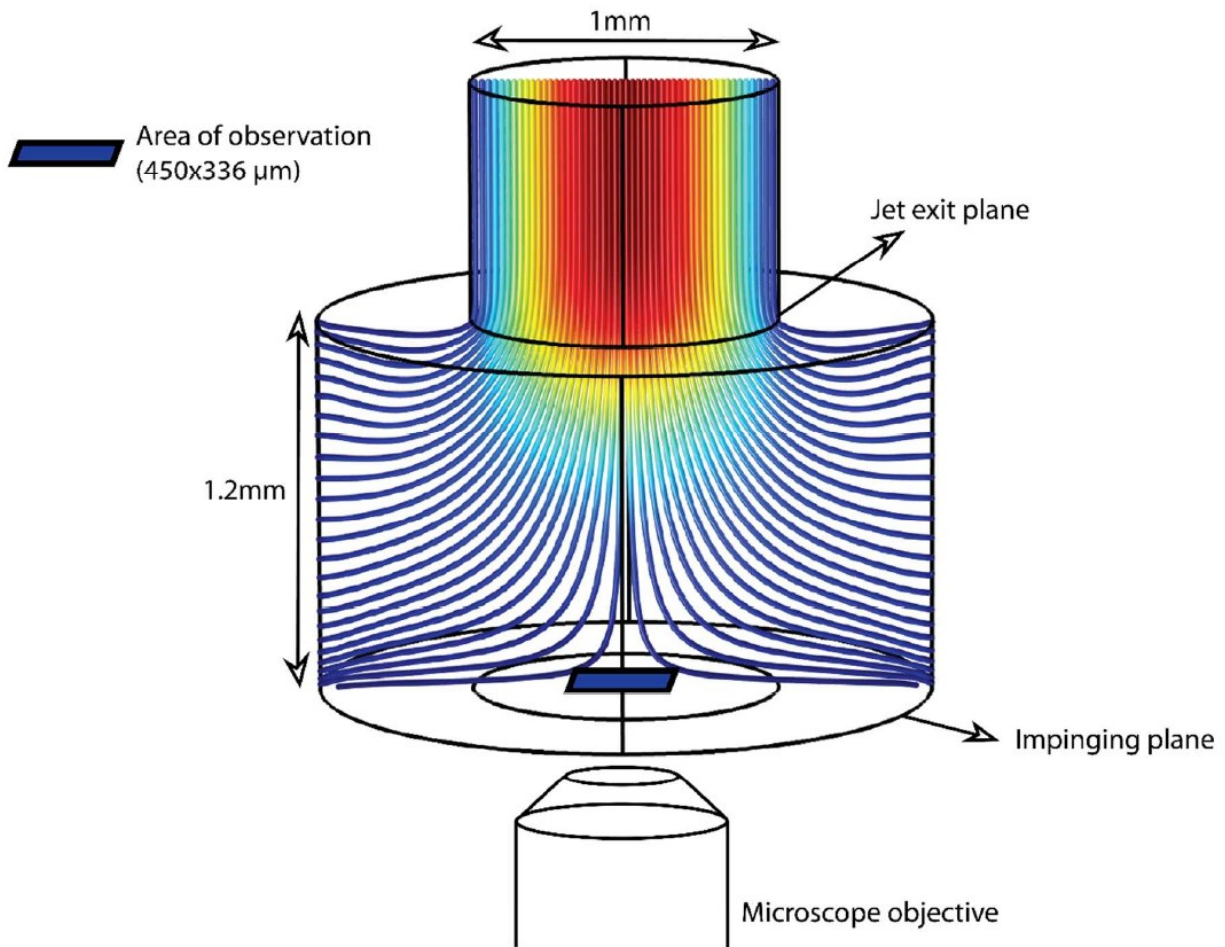

**Figure SI-1.** Schematic of the impinging jet flow chamber. Fluid flow field is represented by color coded low lines (red high velocity, blue low velocity). The jet is 0.5 mm in radius and the impinging plane is located 1.25 mm below the jet exit. Images of attached colloids are acquired via an inverted microscope across an area of observation of  $450 \times 336 \mu\text{m}$  on the impinging plane aligned with the center of the jet.<sup>4-6</sup>

**Table SI-3.** RMS roughness values used in simulations regarding attachment of CML onto silica surfaces. Roughness values were determined as described in Rasmuson et al.<sup>7</sup>

| <b>CML diameter (<math>\mu\text{m}</math>)</b> | <b>RMS roughness (nm)</b> |
|------------------------------------------------|---------------------------|
| 0.1                                            | 4.7                       |
| 0.25                                           | 6.4                       |
| 1.1                                            | 10.3                      |
| 2.0                                            | 13.0                      |
| 4.4                                            | 17.0                      |
| 6.8                                            | 19.8                      |

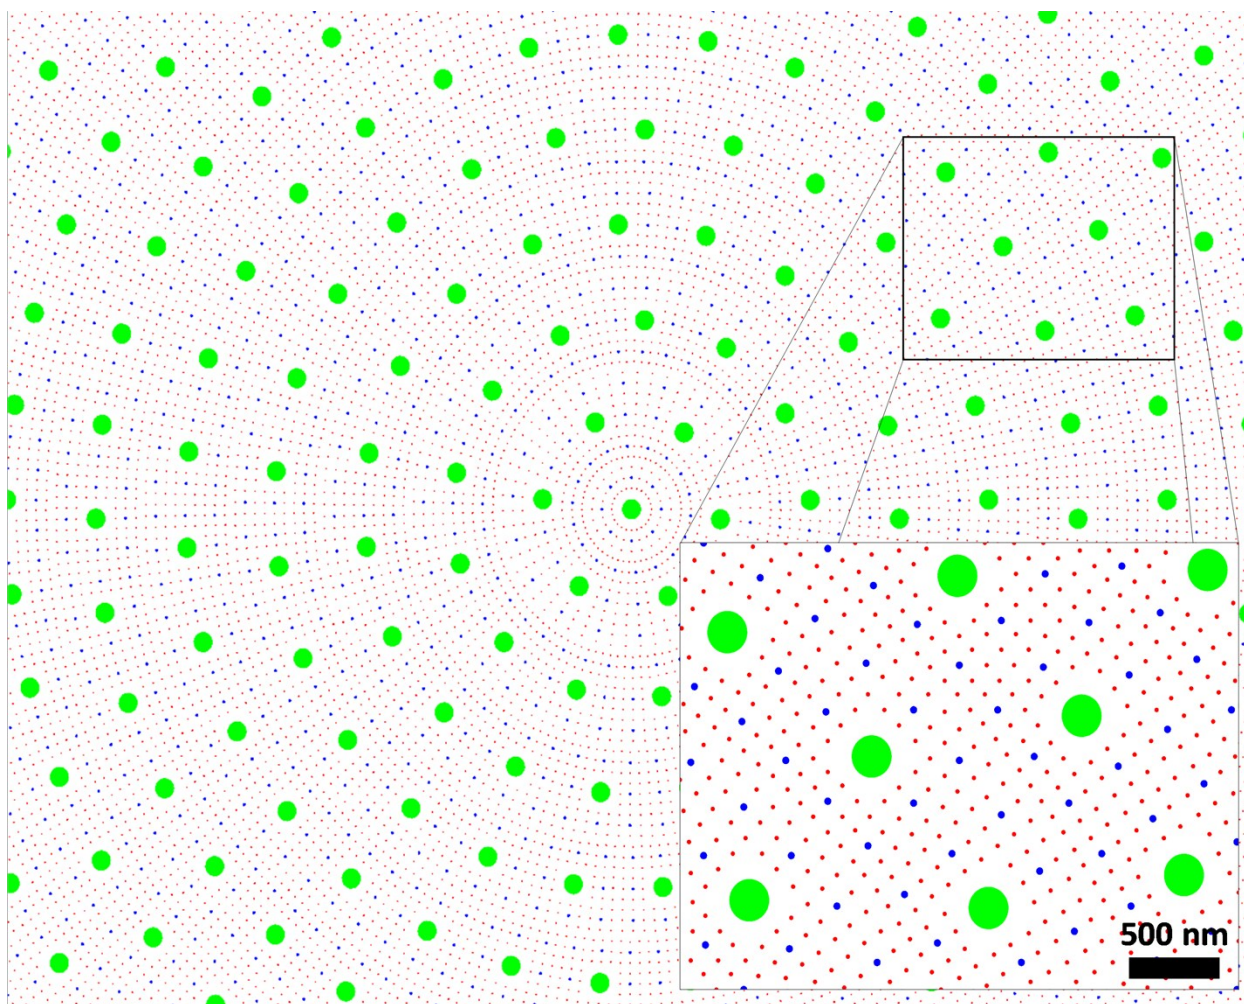

**Figure SI-2.** Representation of DRNH using power law-distributed heterodomains of three different sizes (green: 220 nm, blue: 40 nm, and red: 25 nm) increasing frequency ratios (1:8:64) superimposed onto the same surface. In simulations, the pattern was expanded to cover the entire surface at a defined spatial density (SD).

**Table SI-4.** Deposition rate constants ( $k_f$ ), collector efficiencies ( $\eta$ ), and collision efficiencies ( $\alpha$ ) from published literature meeting criteria provided in main text.

| Colloid                                               | Colloid diameter ( $\mu\text{m}$ ) | Surface         | Grain diameter ( $\mu\text{m}$ ) | Vpore (m/day) | pH  | IS (mM) | $k_f$ (1/s) |             | $\eta$    |             | $\alpha$ |
|-------------------------------------------------------|------------------------------------|-----------------|----------------------------------|---------------|-----|---------|-------------|-------------|-----------|-------------|----------|
|                                                       |                                    |                 |                                  |               |     |         | Favorable   | Unfavorable | Favorable | Unfavorable |          |
| <i>Cryptosporidium parvum</i> Oocysts <sup>8</sup>    | 4.100                              | Silicate sand   | 375.0                            | 18.506        | 8.0 | 1.0     | 2.46E-03    | 3.36E-03    | 5.03E-03  | 6.86E-03    | 1.363    |
| Copolymer-modified Latex Microspheres <sup>8</sup>    | 4.300                              | Silicate sand   | 375.0                            | 18.506        | 8.0 | 1.0     | 2.48E-03    | 3.31E-03    | 5.07E-03  | 6.75E-03    | 1.331    |
| Anatase <sup>9</sup>                                  | 0.198                              | Silicate sand   | 358.5                            | 101.647       | 7.0 | 10.0    | 1.67E-02    | 1.52E-03    | 5.11E-03  | 4.66E-04    | 0.091    |
| CML <sup>3</sup>                                      | 0.110                              | Glass beads     | 508.5                            | 4.000         | 6.7 | 20.0    | 2.78E-03    | 2.00E-04    | 3.23E-02  | 2.36E-03    | 0.073    |
| CML <sup>3</sup>                                      | 0.200                              | Glass beads     | 508.5                            | 4.000         | 6.7 | 20.0    | 2.22E-03    | 7.22E-05    | 2.59E-02  | 8.53E-04    | 0.033    |
| CML <sup>3</sup>                                      | 0.500                              | Glass beads     | 508.5                            | 4.000         | 6.7 | 20.0    | 1.81E-03    | 1.75E-05    | 2.11E-02  | 2.07E-04    | 0.010    |
| CML <sup>3</sup>                                      | 1.000                              | Glass beads     | 508.5                            | 4.000         | 6.7 | 20.0    | 1.11E-03    | 6.94E-05    | 1.30E-02  | 8.20E-04    | 0.063    |
| CML <sup>3</sup>                                      | 2.000                              | Glass beads     | 508.5                            | 4.000         | 6.7 | 20.0    | 1.14E-03    | 2.56E-04    | 1.34E-02  | 3.01E-03    | 0.226    |
| MS2 <sup>10</sup>                                     | 0.025                              | Ohio river sand | 245.0                            | 38.750        | 7.0 | 6.8     | 1.77E-01    | 2.91E-04    | 9.05E-02  | 1.56E-04    | 0.002    |
| PRD1 <sup>10</sup>                                    | 0.065                              | Ohio river sand | 245.0                            | 38.750        | 7.0 | 6.8     | 8.07E-02    | 9.87E-05    | 4.23E-02  | 5.29E-05    | 0.001    |
| OY107 <sup>10</sup>                                   | 0.690                              | Ohio river sand | 245.0                            | 38.750        | 7.0 | 6.8     | 1.26E-02    | 2.70E-05    | 6.74E-03  | 1.45E-05    | 0.002    |
| DA001 <sup>10</sup>                                   | 0.850                              | Ohio river sand | 245.0                            | 38.750        | 7.0 | 6.8     | 1.10E-02    | 5.72E-05    | 5.87E-03  | 3.06E-05    | 0.005    |
| E. Coli <sup>10</sup>                                 | 1.000                              | Ohio river sand | 245.0                            | 38.750        | 7.0 | 6.8     | 1.00E-02    | 5.73E-05    | 5.34E-03  | 3.07E-05    | 0.006    |
| <i>Cryptosporidium parvum</i> Oocysts <sup>10</sup>   | 5.500                              | Ohio river sand | 245.0                            | 38.750        | 7.0 | 6.8     | 2.17E-02    | 1.83E-02    | 1.16E-02  | 9.75E-03    | 0.842    |
| <i>Cryptosporidium parvum</i> Oocysts <sup>11</sup>   | 4.000                              | Glass beads     | 328.0                            | 19.382        | 8.0 | 10.0    | 5.80E-03    | 1.70E-03    | 8.94E-03  | 2.63E-03    | 0.294    |
| Carboxylate-modified Latex Microspheres <sup>11</sup> | 3.000                              | Glass beads     | 328.0                            | 19.382        | 8.0 | 10.0    | 4.17E-03    | 1.29E-04    | 6.43E-03  | 2.00E-04    | 0.031    |

**Table SI-4 (Continued).** Deposition rate constants ( $k_f$ ), collector efficiencies ( $\eta$ ), and collision efficiencies ( $\alpha$ )

|                                                                 |       |                 |               |         |      |      |          |          |          |             |       |
|-----------------------------------------------------------------|-------|-----------------|---------------|---------|------|------|----------|----------|----------|-------------|-------|
| Cerium Oxide <sup>12</sup>                                      | 0.063 | Silicate sand   | 717.0         | 167.169 | 6.0  | 1.0  | 8.72E-03 | 3.23E-03 | 3.26E-03 | 1.21E-03    | 0.370 |
| Silica <sup>13</sup>                                            | 0.052 | Silicate sand   | 220.0         | 3.710   | 10.0 | 1.0  | 5.97E-02 | 8.89E-06 | 2.66E-01 | 4.60E-05    | 0.000 |
| Silica <sup>13</sup>                                            | 0.008 | Silicate sand   | 220.0         | 3.710   | 10.0 | 1.0  | 8.26E-01 | 4.17E-05 | 9.86E-01 | 2.16E-04    | 0.000 |
| Zinc Oxide <sup>14</sup>                                        | 0.300 | Quartz sand     | 510.0         | 8.023   | 8.0  | 5.0  | 3.29E-03 | 4.72E-04 | 2.06E-02 | 2.98E-03    | 0.145 |
| Rutile <sup>15</sup>                                            | 0.149 | Quartz sand     | 275.0         | 11.909  | 6.0  | 1.0  | 2.06E-02 | 6.37E-04 | 4.25E-02 | 1.34E-03    | 0.032 |
| Zero valent Iron <sup>16</sup>                                  | 0.065 | Quartz sand     | 725.0         | 73.339  | 8.0  | -    | 1.09E-02 | 5.37E-03 | 1.03E-02 | 5.08E-03    | 0.494 |
| DA001 <sup>17</sup>                                             | 1.100 | Glass beads     | 508.5         | 4.002   | 6-9  | 4.0  | 1.11E-03 | 5.56E-05 | 1.30E-02 | 6.56E-04    | 0.050 |
| <i>Escherichia Coli</i> D21g <sup>18</sup>                      | 1.700 | Quartz sand     | 205.0         | 42.195  | 5.7  | 3.2  | 1.11E-03 | 2.40E-04 | 1.30E-02 | 1.18E-04    | 0.009 |
| <i>Escherichia Coli</i> D21g <sup>19</sup>                      | 0.960 | Quartz sand     | 275.0         | 31.930  | 5.7  | 10.0 | 1.70E-02 | 6.00E-04 | 1.55E-02 | 5.51E-04    | 0.036 |
| <i>Escherichia Coli</i> XL1-Blue <sup>19</sup>                  | 1.100 | Quartz sand     | 275.0         | 31.930  | 5.7  | 10.0 | 1.70E-02 | 4.80E-04 | 1.55E-02 | 4.41E-04    | 0.028 |
| Carboxylate-modified latex microspheres <sup>(This study)</sup> | 0.110 | Soda-lime glass | Impinging jet | 2.000   | 6.7  | 6.0  | -        | -        | 0.000114 | 4.70309E-05 | 0.413 |
| Carboxylate-modified latex microspheres <sup>(This study)</sup> | 0.250 | Soda-lime glass | Impinging jet | 2.000   | 6.7  | 6.0  | -        | -        | 3.16E-05 | 6.27953E-06 | 0.199 |
| Carboxylate-modified latex microspheres <sup>(This study)</sup> | 1.100 | Soda-lime glass | Impinging jet | 2.000   | 6.7  | 6.0  | -        | -        | 1.94E-05 | 1.85494E-06 | 0.096 |
| Carboxylate-modified latex microspheres <sup>(This study)</sup> | 2.000 | Soda-lime glass | Impinging jet | 2.000   | 6.7  | 6.0  | -        | -        | 1.06E-05 | 1.51048E-06 | 0.143 |
| Carboxylate-modified latex microspheres <sup>(This study)</sup> | 4.400 | Soda-lime glass | Impinging jet | 2.000   | 6.7  | 6.0  | -        | -        | 4.15E-05 | 3.03814E-05 | 0.732 |
| Carboxylate-modified latex microspheres <sup>(This study)</sup> | 6.800 | Soda-lime glass | Impinging jet | 2.000   | 6.7  | 6.0  | -        | -        | 0.000178 | 0.0000919   | 0.518 |
| Carboxylate-modified latex microspheres <sup>(This study)</sup> | 0.110 | Soda-lime glass | Impinging jet | 2.000   | 6.7  | 20.0 | -        | -        | 0.000114 | 5.38031E-05 | 0.473 |
| Carboxylate-modified latex microspheres <sup>(This study)</sup> | 0.250 | Soda-lime glass | Impinging jet | 2.000   | 6.7  | 20.0 | -        | -        | 3.16E-05 | 1.6654E-05  | 0.528 |
| Carboxylate-modified latex microspheres <sup>(This study)</sup> | 1.100 | Soda-lime glass | Impinging jet | 2.000   | 6.7  | 20.0 | -        | -        | 1.94E-05 | 4.36965E-06 | 0.225 |



**Table SI-4 (Continued).** Deposition rate constants ( $k_f$ ), collector efficiencies ( $\eta$ ), and collision efficiencies ( $\alpha$ )

|                                                                  |       |                 |               |       |     |      |   |   |          |             |       |
|------------------------------------------------------------------|-------|-----------------|---------------|-------|-----|------|---|---|----------|-------------|-------|
| Carboxylate-modified latex microspheres <sup>(This study)</sup>  | 2.000 | Soda-lime glass | Impinging jet | 2.000 | 6.7 | 20.0 | - | - | 1.06E-05 | 5.2718E-06  | 0.498 |
| Carboxylate-modified latex microspheres <sup>(This study)</sup>  | 4.400 | Soda-lime glass | Impinging jet | 2.000 | 6.7 | 20.0 | - | - | 4.15E-05 | 4.74588E-05 | 1.144 |
| Carboxylate-modified latex microspheres <sup>(This study)</sup>  | 6.800 | Soda-lime glass | Impinging jet | 2.000 | 6.7 | 20.0 | - | - | 0.000178 | 0.000122502 | 0.690 |
| Carboxylate-modified latex microspheres <sup>(This study)</sup>  | 0.110 | Soda-lime glass | Impinging jet | 2.000 | 8.0 | 6.0  | - | - | 0.000114 | 2.1338E-05  | 0.188 |
| Carboxylate-modified latex microspheres <sup>(This study)</sup>  | 0.250 | Soda-lime glass | Impinging jet | 2.000 | 8.0 | 6.0  | - | - | 3.16E-05 | 4.62587E-07 | 0.015 |
| Carboxylate-modified latex microspheres <sup>(This study)</sup>  | 1.100 | Soda-lime glass | Impinging jet | 2.000 | 8.0 | 6.0  | - | - | 1.94E-05 | 7.55524E-08 | 0.004 |
| Carboxylate-modified latex microspheres <sup>(This study)</sup>  | 2.000 | Soda-lime glass | Impinging jet | 2.000 | 8.0 | 6.0  | - | - | 1.06E-05 | 1.60113E-07 | 0.015 |
| Carboxylate-modified latex microspheres <sup>(This study)</sup>  | 4.400 | Soda-lime glass | Impinging jet | 2.000 | 8.0 | 6.0  | - | - | 4.15E-05 | 3.03814E-05 | 0.732 |
| Carboxylate-modified latex microspheres <sup>(This study)</sup>  | 6.800 | Soda-lime glass | Impinging jet | 2.000 | 8.0 | 6.0  | - | - | 0.000178 | 0.000108403 | 0.611 |
| Carboxylate-modified latex microspheres <sup>(This study)</sup>  | 0.110 | Soda-lime glass | Impinging jet | 2.000 | 8.0 | 20.0 | - | - | 0.000114 | 1.47937E-05 | 0.130 |
| Carboxylate-modified latex microspheres <sup>(This study)</sup>  | 0.250 | Soda-lime glass | Impinging jet | 2.000 | 8.0 | 20.0 | - | - | 3.16E-05 | 5.19027E-06 | 0.164 |
| Carboxylate-modified latex microspheres <sup>(This study)</sup>  | 1.100 | Soda-lime glass | Impinging jet | 2.000 | 8.0 | 20.0 | - | - | 1.94E-05 | 3.65429E-07 | 0.019 |
| Carboxylate-modified latex microspheres <sup>(This study)</sup>  | 2.000 | Soda-lime glass | Impinging jet | 2.000 | 8.0 | 20.0 | - | - | 1.06E-05 | 4.96712E-07 | 0.047 |
| Carboxylate-modified latex microspheres <sup>(This study)</sup>  | 4.400 | Soda-lime glass | Impinging jet | 2.000 | 8.0 | 20.0 | - | - | 4.15E-05 | 1.85407E-05 | 0.447 |
| Carboxylate-modified latex microspheres <sup>(This study)</sup>  | 6.800 | Soda-lime glass | Impinging jet | 2.000 | 8.0 | 20.0 | - | - | 0.000178 | 0.000201867 | 1.137 |
| Carboxylate-modified silica microspheres <sup>(This study)</sup> | 1.000 | Soda-lime glass | Impinging jet | 2.000 | 6.7 | 6.0  | - | - | 9.33E-05 | 2.21681E-06 | 0.024 |
| Carboxylate-modified silica microspheres <sup>(This study)</sup> | 3.000 | Soda-lime glass | Impinging jet | 2.000 | 6.7 | 6.0  | - | - | 0.000366 | 0.000387712 | 1.060 |

## References Cited

- 1 H. Ohshima, Electrophoresis of soft particles: Analytic approximations, *Electrophoresis*, 2006, **27**, 526–533.
- 2 B. J. Kirby and E. F. Hasselbrink, Zeta potential of microfluidic substrates: 1. Theory, experimental techniques, and effects on separations, *Electrophoresis*, 2004, **25**, 187–202.
- 3 M. Tong and W. P. Johnson, Excess colloid retention in porous media as a function of colloid size, fluid velocity, and grain angularity, *Environ. Sci. Technol.*, 2006, **40**, 7725–7731.
- 4 E. Pazmino, J. Trauscht, B. Dame and W. P. Johnson, Power Law Size-Distributed Heterogeneity Explains Colloid Retention on Soda Lime Glass in the Presence of Energy Barriers, *Langmuir*, 2014, **30**, 5412–5421.
- 5 J. Trauscht, E. Pazmino and W. P. Johnson, Prediction of Nanoparticle and Colloid Attachment on Unfavorable Mineral Surfaces Using Representative Discrete Heterogeneity, *Langmuir*, 2015, **31**, 9366–9378.
- 6 M. Hilpert, A. Rasmuson and W. P. Johnson, A binomial modeling approach for upscaling colloid transport under unfavorable conditions: Emergent prediction of extended tailing, *Water Resour. Res.*, 2017, **53**, 5626–5644.
- 7 A. Rasmuson, K. VanNess, C. Ron and W. P. Johnson, Hydrodynamic versus Surface Interaction Impacts of Roughness in Closing the Gap between Favorable and Unfavorable Colloid Transport Conditions, *Environ. Sci. Technol.*, 2019, **53**, 2450–2459.

- 8 L. Liu, Y. Wang, R. Narain and Y. Liu, Functionalized polystyrene microspheres as *Cryptosporidium* surrogates, *Colloids Surfaces B Biointerfaces*, 2019, **175**, 680–687.
- 9 H. F. Lecoanet, J. Y. Bottero and M. R. Wiesner, Laboratory assessment of the mobility of nanomaterials in porous media, *Environ. Sci. Technol.*, 2004, **38**, 5164–5169.
- 10 V. Gupta, W. P. Johnson, P. Shafieian, H. Ryu, A. Alum, M. Abbaszadegan, S. A. Hubbs and T. Rauch-Williams, Riverbank filtration: Comparison of pilot scale transport with theory, *Environ. Sci. Technol.*, 2009, **43**, 669–676.
- 11 N. Tufenkji and M. Elimelech, Spatial distributions of *Cryptosporidium* oocysts in porous media: Evidence for dual mode deposition, *Environ. Sci. Technol.*, 2005, **39**, 3620–3629.
- 12 Z. Li, E. Sahle-Demessie, A. A. Hassan and G. A. Sorial, Transport and deposition of CeO<sub>2</sub> nanoparticles in water-saturated porous media, *Water Res.*, 2011, **45**, 4409–4418.
- 13 C. Wang, A. D. Bobba, R. Attinti, C. Shen, V. Lazouskaya, L. P. Wang and Y. Jin, Retention and transport of silica nanoparticles in saturated porous media: Effect of concentration and particle size, *Environ. Sci. Technol.*, 2012, **46**, 7151–7158.
- 14 X. Jiang, M. Tong, R. Lu and H. Kim, Transport and deposition of ZnO nanoparticles in saturated porous media, *Colloids Surfaces A Physicochem. Eng. Asp.*, 2012, **401**, 29–37.
- 15 G. Chen, X. Liu and C. Su, Transport and retention of TiO<sub>2</sub> rutile nanoparticles in saturated porous media under low-ionic-strength conditions: Measurements and mechanisms, *Langmuir*, 2011, **27**, 5393–5402.

- 16 P. Jiemvarangkul, W. X. Zhang and H. L. Lien, Enhanced transport of polyelectrolyte stabilized nanoscale zero-valent iron (nZVI) in porous media, *Chem. Eng. J.*, 2011, **170**, 482–491.
- 17 M. Tong, X. Li, C. N. Brow and W. P. Johnson, Detachment-influenced transport of an adhesion-deficient bacterial strain within water-reactive porous media, *Environ. Sci. Technol.*, 2005, **39**, 2500–2508.
- 18 J. A. Redman, S. L. Walker and M. Elimelech, Bacterial Adhesion and Transport in Porous Media: Role of the Secondary Energy Minimum, *Environ. Sci. Technol.*, 2004, **38**, 1777–1785.
- 19 H. N. Kim and S. L. Walker, Escherichia coli transport in porous media: Influence of cell strain, solution chemistry, and temperature, *Colloids Surfaces B Biointerfaces*, 2009, **71**, 160–167.
